# Supplementary material
Source: PubMed Central journal article supplement (PMC1887561)

**A**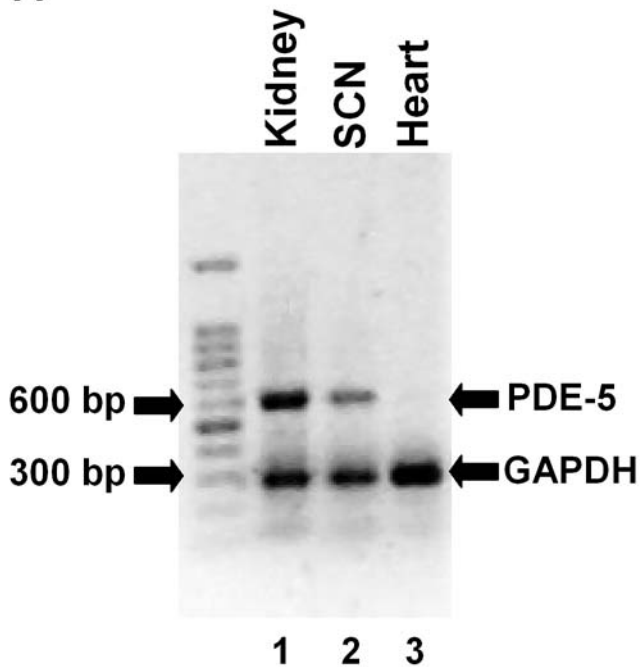**B**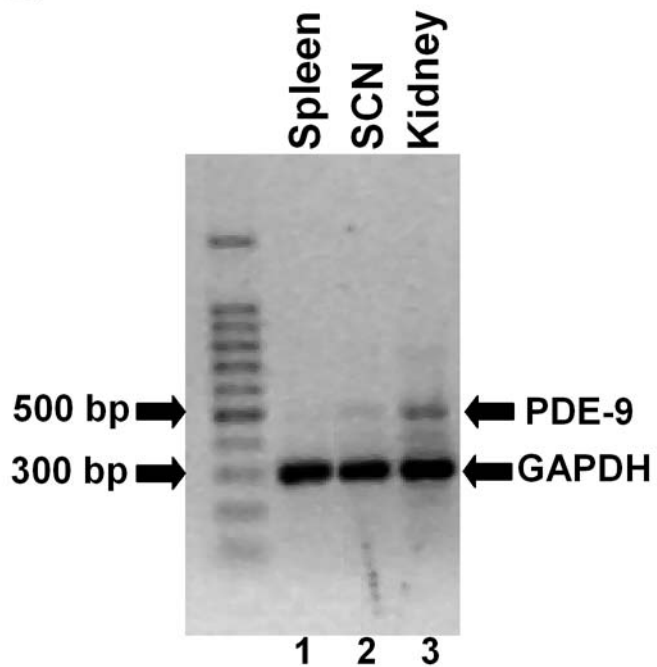

Supplement: pnas_0703388104_1.pdf [file pnas_0703388104_1.pdf]
